# Supplementary material for: Serum calprotectin as new biomarker for disease severity in idiopathic pulmonary fibrosis: a cross-sectional study in two independent cohorts
Source: PubMed Central journal article supplement — BMJ Open Respir Res. 2021 Jan 15;8(1):e000827. doi: 10.1136/bmjresp-2020-000827 (PMC7813379; doi:10.1136/bmjresp-2020-000827), 2021-01-15

## Supplement data

**Serum calprotectin as new biomarker for disease severity in idiopathic pulmonary fibrosis - a cross sectional study in two independent cohorts**

Carlos Machahua, Sabina A. Guler, Michael P. Horn, Lurdes Planas-Cerezales, Ana Montes-Worboys, Thomas K. Geiser, Maria Molina-Molina, Manuela Funke-Chambour.

**Supplemental figure S1.** Distribution of serum calprotectin in healthy volunteers and patients with idiopathic pulmonary fibrosis from the derivation and the validation cohort.

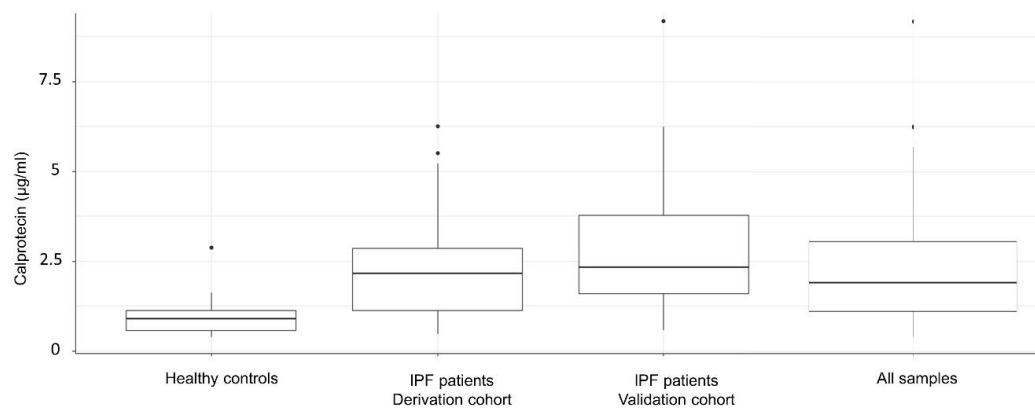

**Supplemental figure S2.** Kaplan Meier survival curves for patients with idiopathic pulmonary fibrosis from the derivation (A) and the validation (B) cohort stratified by the highest quartile of serum calprotectin levels.

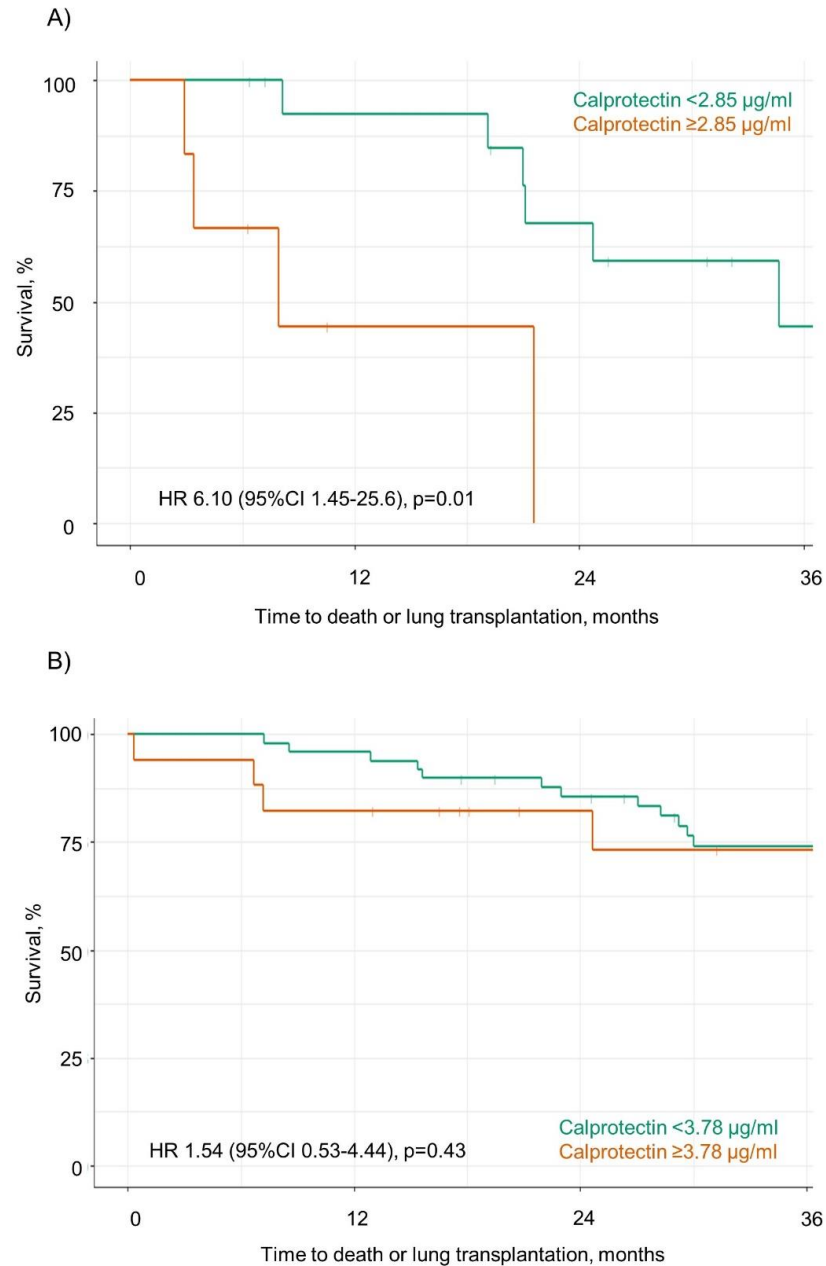

Supplement: bmjresp-2020-000827supp001.pdf [file bmjresp-2020-000827supp001.pdf]
